# Supplementary material for: Palladium complexes with 3-phenylpropylamine ligands: synthesis, structures, theoretical studies and application in the aerobic oxidation of alcohols as heterogeneous catalysts
Source: Royal Society of Chemistry journal article supplement (doi:10.1039/c5ra17249g), 2015-01-01
Supplement: c5ra17249g1.pdf [file c5ra17249g1.pdf]

## Supporting Information

### **Palladium complexes with 3-phenylpropylamine ligand: synthesis, structures, theoretical studies and application in the aerobic oxidation of alcohols as heterogeneous catalysts**

Kazem Karami,<sup>a,\*</sup> Nasrin Haghghat Naeini,<sup>a</sup> Vaclav Eigner,<sup>b</sup> Michal Dusek,<sup>b</sup> Janusz Lipkowski,<sup>c</sup> Pablo Hervés,<sup>d</sup> and Hossein Tavakol<sup>a</sup>

<sup>a</sup>*Department of Chemistry, Isfahan University of Technology, Isfahan 84156/83111, Iran.*

<sup>b</sup>*Institute of Physics, Na Slovance 2, 182 21, Praha 8, Czech Republic.*

<sup>c</sup>*Institute of Physical Chemistry, Polish Academy of Sciences, Kasprzaka 44/52, 01-224 Warsaw, Poland.*

<sup>d</sup>*Department of chemistry, University of Vigo, 36310, Vigo, Spain.*

Corresponding Author: Kazem Karami E-mail: [karami@cc.iut.ac.ir](mailto:karami@cc.iut.ac.ir)

#### **Table of contents**

|                                                            |    |
|------------------------------------------------------------|----|
| Synthesis and characterization of palladium complexes..... | 2  |
| Table S1.....                                              | 9  |
| Table S2.....                                              | 10 |
| Table S3.....                                              | 10 |
| HR-XPS N1S CB[6]-Pd NPs ( <b>3</b> ).....                  | 11 |

## General information

All reactants were purchased from Merck Chemical Company and Aldrich and used as received.

Solvents were used without further purification or drying.

Fourier transform infrared (FTIR) spectra were measured in KBr pellets with a Jasco FT/IR 680 plus instrument. NMR spectra were obtained on a Bruker spectrometer at 400.13 MHz ( $^1\text{H}$ ).

Elemental analysis was performed on LECO, CHNS-932 apparatus. Molar conductance of the complexes was measured in acetone at  $1 \times 10^{-3}$  M using an Elmetron CC-505 conductivity meter.

### Synthesis of *trans*-[Pd(C<sub>6</sub>H<sub>5</sub>(CH<sub>2</sub>)<sub>3</sub>NH<sub>2</sub>)<sub>2</sub>(OAc)<sub>2</sub>] (**1**)

Pd(OAc)<sub>2</sub> (0.0448 g, 0.2 mmol) was added to a solution of 3-phenylpropylamine (28  $\mu\text{L}$ , 0.2 mmol) in toluene (10 mL) and the resulting mixture was heated under reflux for 24 h. The solvent was then evaporated and the resulting yellow solid residue was dissolved in n-hexane (10 mL) and CH<sub>2</sub>Cl<sub>2</sub> (2 mL). A pale yellow solid immediately precipitated. The mixture was stirred for 2 h at room temperature and the resulting suspension was filtered. The pale yellow solid thus obtained and air dried to give (**1**).

Complex **1**: yellow solid, Yield: (0.06533 g, 66%); m.p. 135 °C.

Anal. calcd for C<sub>22</sub>H<sub>32</sub>N<sub>2</sub>O<sub>4</sub>Pd: C, 53.39; H, 6.52; N, 5.66. Found: C, 53.26; H, 6.65; N, 5.73.

IR:  $\nu_{\text{max}}/\text{cm}^{-1}$  1573 and 1388 (CO), 3218 and 3118 (NH<sub>2</sub>).

$^1\text{H}$  NMR (400 MHz, CDCl<sub>3</sub>, 25 °C, TMS):  $\delta$  (ppm): 1.85 (s, 3H, MeCO<sub>2</sub>), 2.04 (m, 2H, H<sub>2</sub>), 2.53 (m, 2H, H<sub>1</sub>), 2.60 (t,  $^3J_{\text{HH}} = 7.6$  Hz, 2H, H<sub>3</sub>), 3.77 (m, 2H, NH<sub>2</sub>), 7.17-7.30 (m, 5H, C<sub>6</sub>H<sub>5</sub>).

$^{13}\text{C}\{^1\text{H}\}$  NMR (CDCl<sub>3</sub>, 25 °C, TMS):  $\delta$  (ppm): 23.51 (Me), 32.50 (C<sub>2</sub>), 32.90 (C<sub>3</sub>), 43.23 (C<sub>1</sub>), 126.15-140.85 (C<sub>aromatic</sub>), 180.18 (CO).

### Synthesis of *trans*-[Pd(C<sub>6</sub>H<sub>5</sub>(CH<sub>2</sub>)<sub>3</sub>NH<sub>2</sub>)<sub>2</sub>(Cl)<sub>2</sub>] (**2**)

To a suspension of **2** in methanol was added excess NaCl and the resulting mixture stirred for 12 h at room temperature. The solvent was then evaporated and the resulting yellow solid residue was dissolved in n-hexane (10 mL) and CH<sub>2</sub>Cl<sub>2</sub> (2 mL). The mixture was stirred for 2 h at room temperature and the resulting suspension was filtered. The pale yellow solid thus obtained and air dried to give (**2**).

Complex **2**: yellow solid, Yield: (0.04656 g, 52%); m.p. 170 °C.

Anal. calcd for C<sub>18</sub>H<sub>26</sub>Cl<sub>2</sub>N<sub>2</sub>Pd: C, 48.29; H, 5.85; N, 6.26. Found: C, 47.79; H, 5.92; N, 6.16.

IR:  $\nu_{\max}/\text{cm}^{-1}$  3223 and 3270 (NH<sub>2</sub>).

<sup>1</sup>H NMR (400 MHz, CDCl<sub>3</sub>, 25 °C, TMS):  $\delta$  (ppm): 2.03 (m, 2H, H<sub>2</sub>), 2.67 (m, 2H, H<sub>1</sub>), 2.69 (m, 2H, H<sub>3</sub>), 2.78 (m, 2H, NH<sub>2</sub>), 7.17-7.31 (m, 5H, C<sub>6</sub>H<sub>5</sub>). <sup>13</sup>C{<sup>1</sup>H} NMR (CDCl<sub>3</sub>, 25 °C, TMS):  $\delta$  (ppm): 32.85 (C<sub>2</sub>), 33.10 (C<sub>3</sub>), 44.87 (C<sub>1</sub>), 126.22-140.65 (C<sub>aromatic</sub>).

### Synthesis of *trans*-[Pd(C<sub>6</sub>H<sub>5</sub>(CH<sub>2</sub>)<sub>3</sub>NH<sub>2</sub>)<sub>2</sub>(PPh<sub>3</sub>)<sub>2</sub>]2Cl (**3**)

To a suspension of palladium complex **2** (0.275 g, 0.5 mmol) in dichloromethane (15 mL) was added PPh<sub>3</sub> (0.262 g, 1 mmol). The resulting solution was stirred for 6 h and then filtered through a plug of MgSO<sub>4</sub>. The filtrate was concentrated to ca. 2 mL, and n-hexane (10 mL) was added to the precipitate **3** as a pale yellow solid, which was collected and air-dried.

Complex **3**: yellow solid, Yield: (0.05047 g, 56%); m.p. 171 °C (dec.).  $\Delta_M$  (Ω<sup>-1</sup> cm<sup>2</sup> mol<sup>-1</sup>)/110.

IR:  $\nu_{\max}/\text{cm}^{-1}$  3395 and 3451 (NH<sub>2</sub>). <sup>1</sup>H NMR (400 MHz, CDCl<sub>3</sub>, 25 °C, TMS):  $\delta$  (ppm): 1.28 (m, 2H, H<sub>2</sub>), 2.09 (m, 2H, H<sub>1</sub>), 2.75 (t, <sup>3</sup>J<sub>HH</sub> = 7.2 Hz, 2H, H<sub>3</sub>), 3.06 (m, 2H, NH<sub>2</sub>), 7.28-7.75 (m, C<sub>6</sub>H<sub>5</sub>). <sup>31</sup>P{<sup>1</sup>H} NMR (CDCl<sub>3</sub>, 25 °C):  $\delta$  (ppm): 23.26 (s, 1P, PPh<sub>3</sub> (complex **3**)), 17.85 (s, 1P, PPh<sub>3</sub> (Pd(PPh<sub>3</sub>)<sub>4</sub>)).

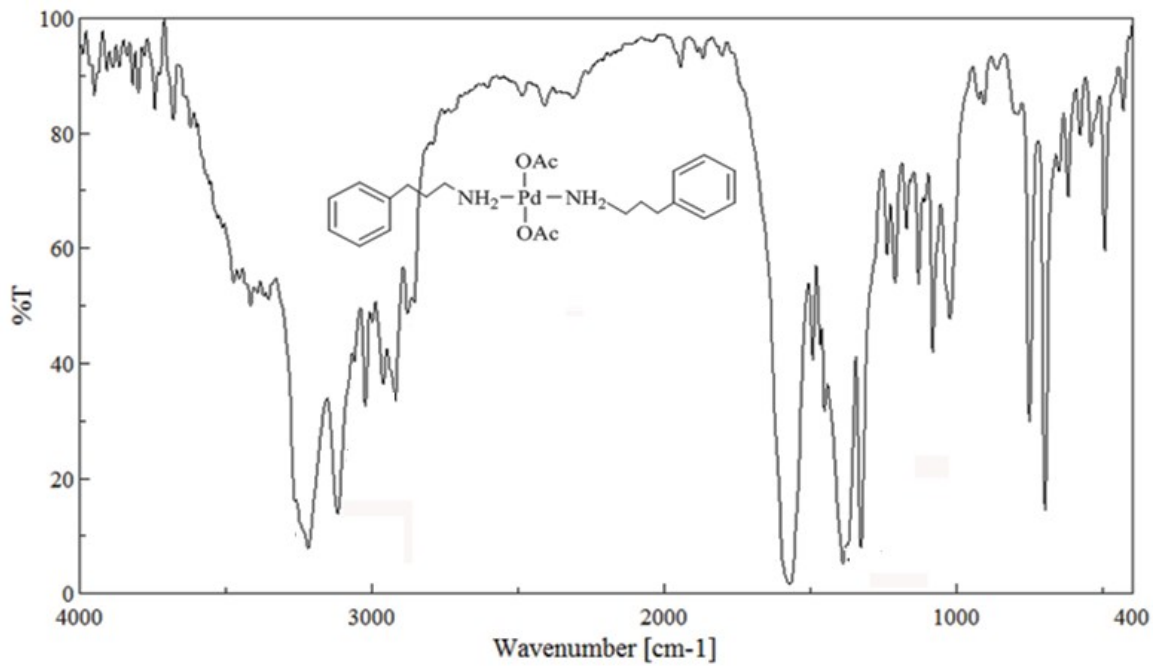

Fig. S1 FTIR spectrum of palladium complex 1 ( $\text{trans-[Pd(C}_6\text{H}_5(\text{CH}_2)_3\text{NH}_2)_2(\text{OAc})_2]$ ).

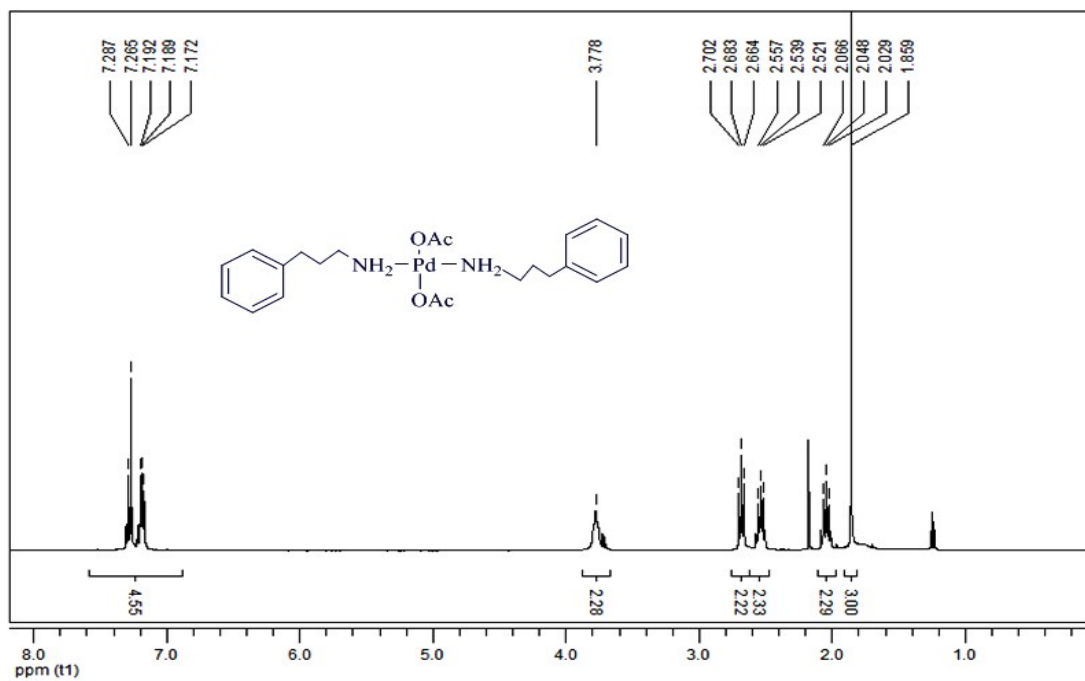

Fig. S2  $^1\text{H}$  NMR spectrum of palladium complex 1 ( $\text{trans-[Pd(C}_6\text{H}_5(\text{CH}_2)_3\text{NH}_2)_2(\text{OAc})_2]$ ).

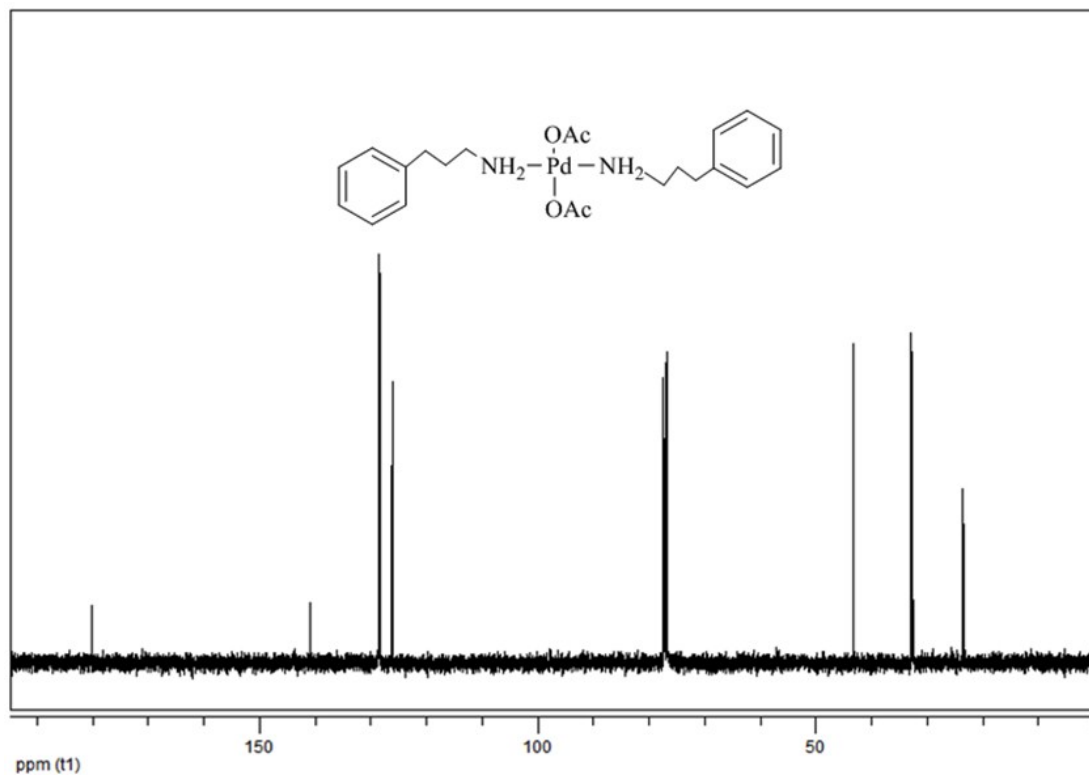

Fig. S3  $^{13}\text{C}\{^1\text{H}\}$  NMR spectrum of palladium complex 1 (*trans*-[Pd(C<sub>6</sub>H<sub>5</sub>(CH<sub>2</sub>)<sub>3</sub>NH<sub>2</sub>)<sub>2</sub>(OAc)<sub>2</sub>]).

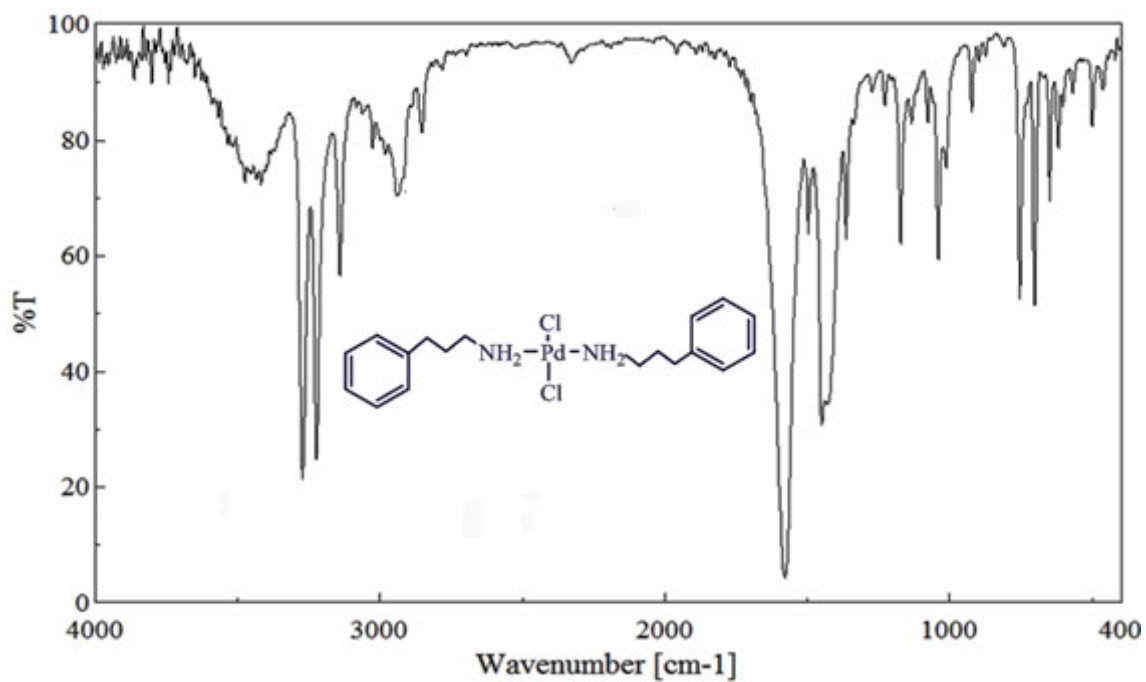

Fig. S4 FTIR spectrum of palladium complex 2 (*trans*-[Pd(C<sub>6</sub>H<sub>5</sub>(CH<sub>2</sub>)<sub>3</sub>NH<sub>2</sub>)<sub>2</sub>(Cl)<sub>2</sub>]).

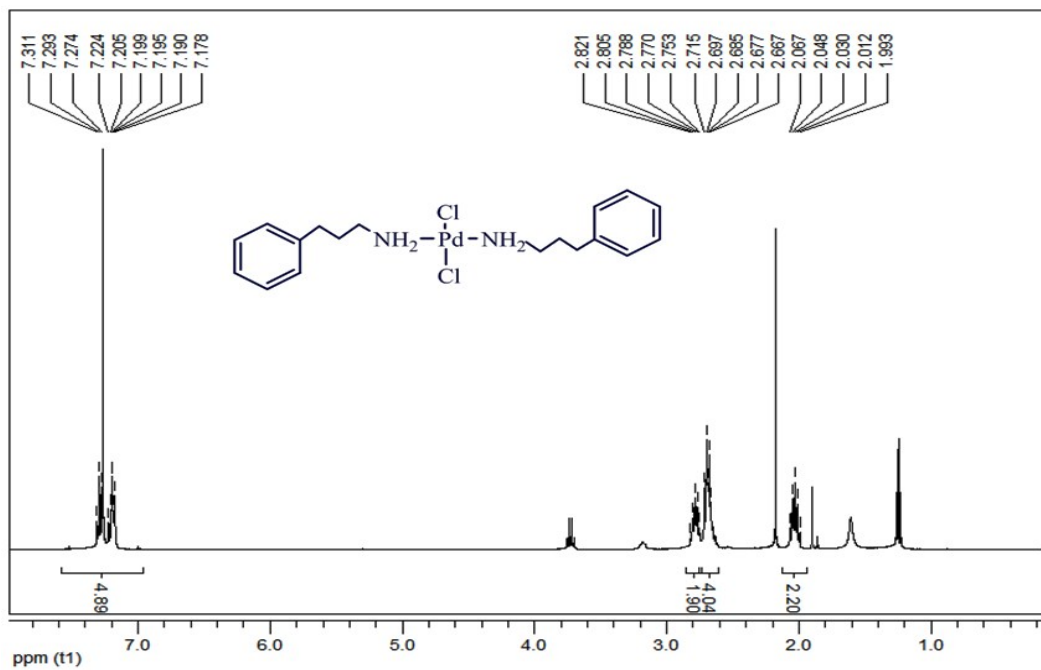

Fig. S5  $^1\text{H}$  NMR spectrum of palladium complex **2** ( $\text{trans-}[\text{Pd}(\text{C}_6\text{H}_5(\text{CH}_2)_3\text{NH}_2)_2(\text{Cl})_2]$ ).

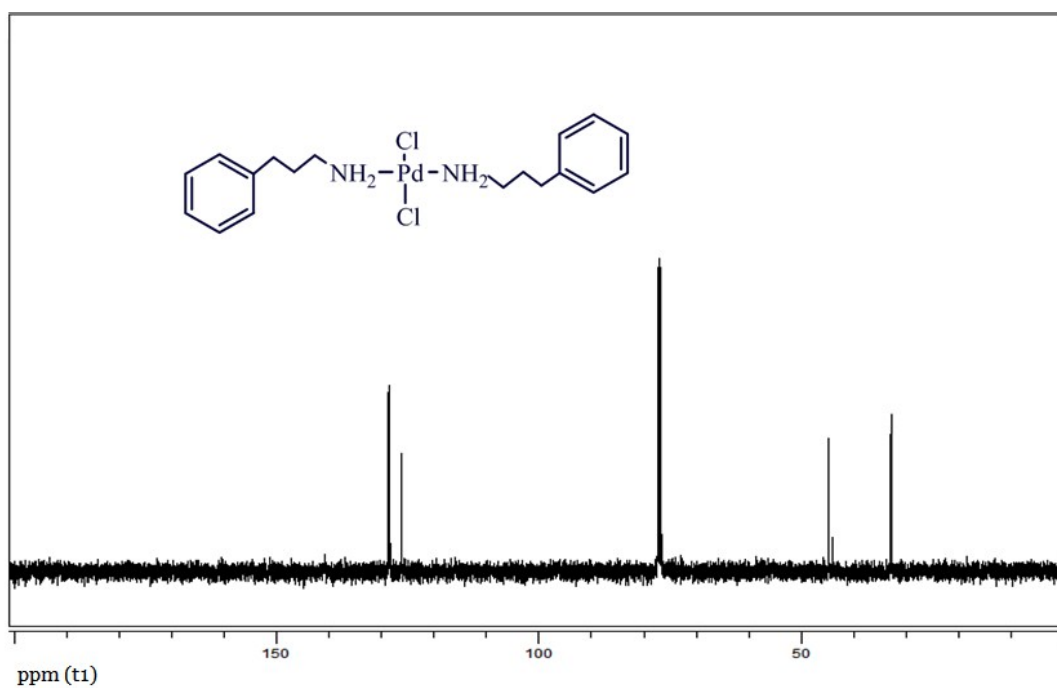

Fig. S6  $^{13}\text{C}\{^1\text{H}\}$  NMR spectrum of palladium complex **2** ( $\text{trans-}[\text{Pd}(\text{C}_6\text{H}_5(\text{CH}_2)_3\text{NH}_2)_2(\text{Cl})_2]$ ).

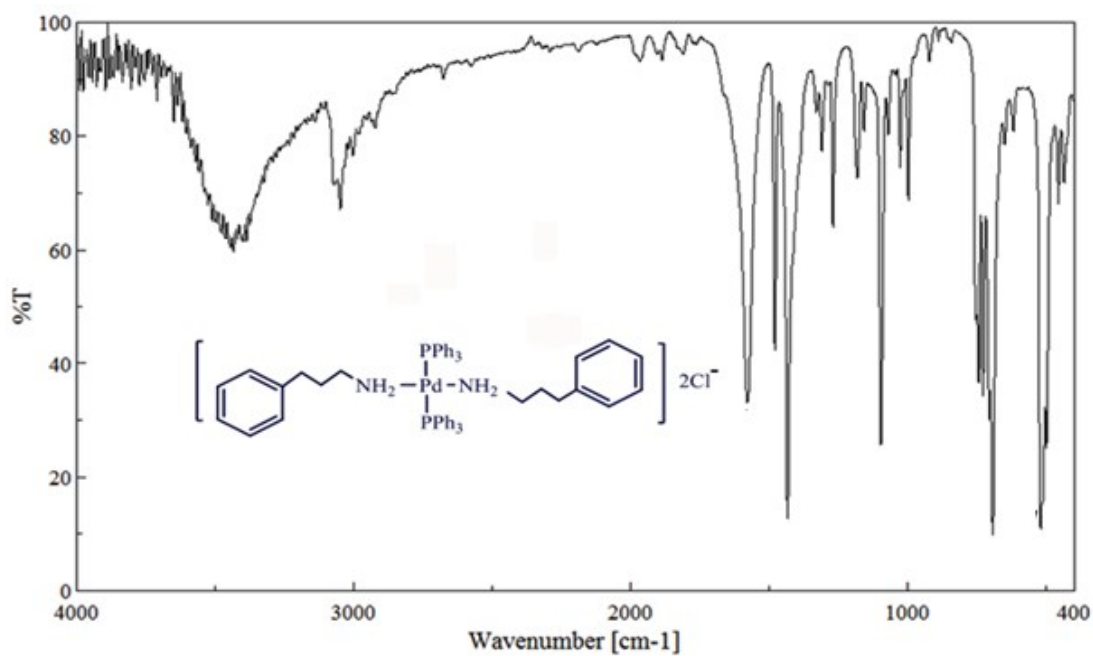

Fig. S7 FTIR spectrum of palladium complex 3 (*trans*-[Pd(C<sub>6</sub>H<sub>5</sub>(CH<sub>2</sub>)<sub>3</sub>NH<sub>2</sub>)<sub>2</sub>(PPh<sub>3</sub>)<sub>2</sub>]2Cl<sup>-</sup>).

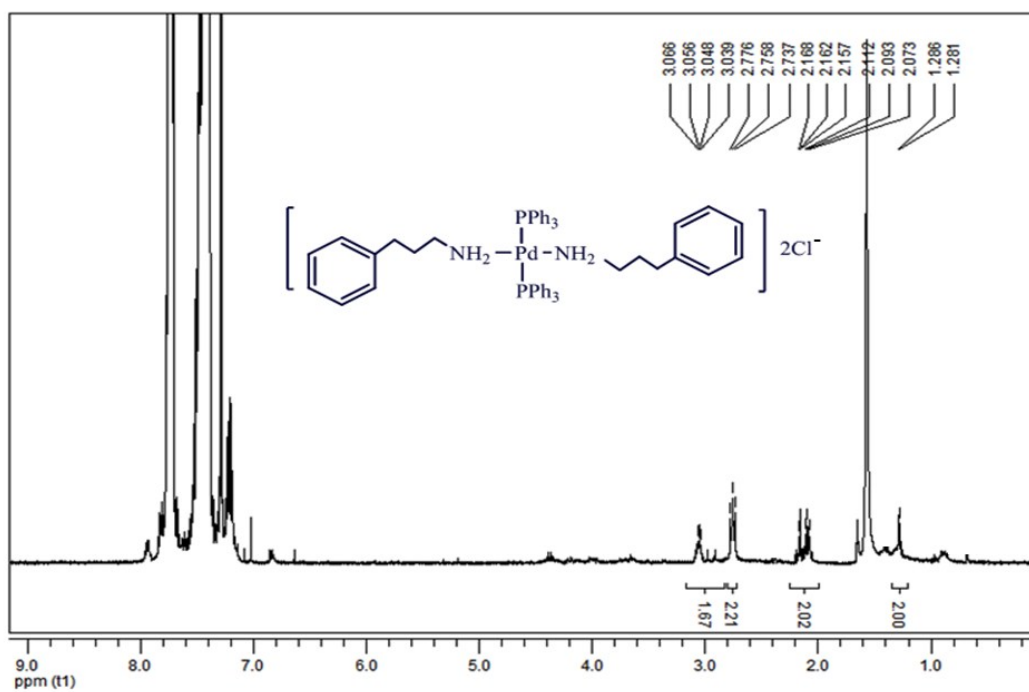

Fig. S8 <sup>1</sup>H NMR spectrum of palladium complex 3 (*trans*-[Pd(C<sub>6</sub>H<sub>5</sub>(CH<sub>2</sub>)<sub>3</sub>NH<sub>2</sub>)<sub>2</sub>(PPh<sub>3</sub>)<sub>2</sub>]2Cl<sup>-</sup>).

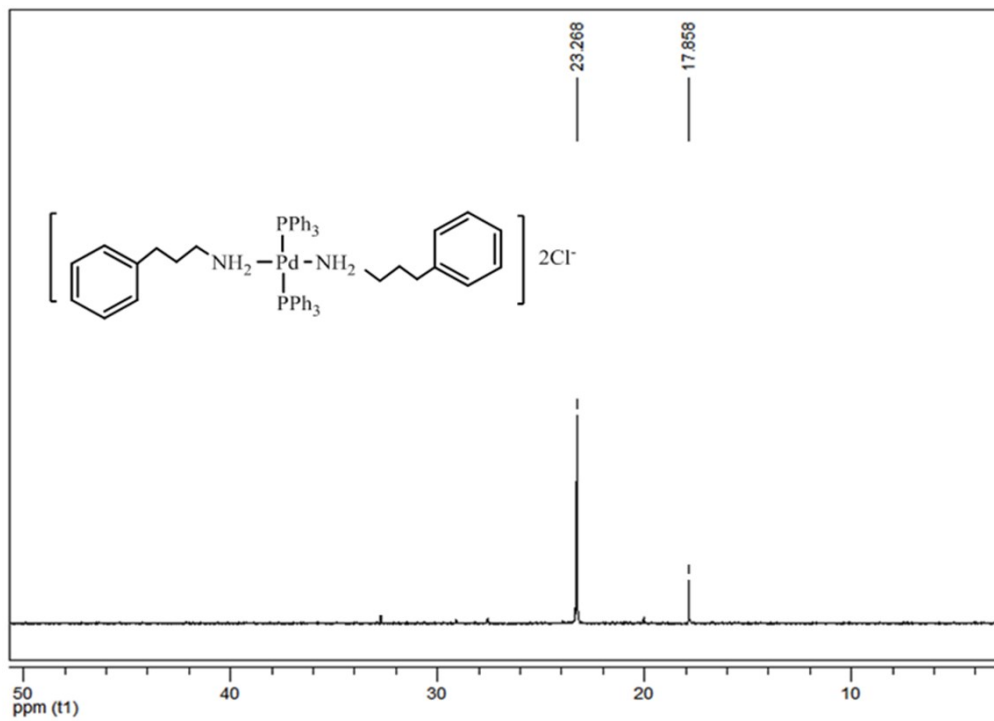

**Fig. S9**  $^{31}\text{P}\{^1\text{H}\}$  NMR spectrum of palladium complex **3** ( $\text{trans}-[\text{Pd}(\text{C}_6\text{H}_5(\text{CH}_2)_3\text{NH}_2)_2(\text{PPh}_3)_2]\text{Cl}^-$ ).



**Table S1**Crystal data and structure refinements of complexes (**1** and **2**)

| Chemical formula                                                              | C <sub>22</sub> H <sub>32</sub> N <sub>2</sub> O <sub>4</sub> Pd( <b>1</b> ) | C <sub>18</sub> H <sub>26</sub> Cl <sub>2</sub> N <sub>2</sub> Pd( <b>2</b> ) |
|-------------------------------------------------------------------------------|------------------------------------------------------------------------------|-------------------------------------------------------------------------------|
| Formula Mass                                                                  | 494.90                                                                       | 447.7                                                                         |
| Crystal system                                                                | Orthorhombic                                                                 | Orthorhombic                                                                  |
| <i>a</i> /Å                                                                   | 10.6350(14)                                                                  | 9.0679 (3)                                                                    |
| <i>b</i> /Å                                                                   | 6.8380(7)                                                                    | 8.3144 (3)                                                                    |
| <i>c</i> /Å                                                                   | 33.586(4)                                                                    | 26.1253 (11)                                                                  |
| $\alpha$ /°                                                                   | 90.00                                                                        | 90.00                                                                         |
| $\beta$ /°                                                                    | 90.00                                                                        | 90.00                                                                         |
| $\gamma$ /°                                                                   | 90.00                                                                        | 90.00                                                                         |
| Unit cell volume/Å <sup>3</sup>                                               | 2442.4(5)                                                                    | 1969.69 (13)                                                                  |
| Temperature/K                                                                 | 100(1)                                                                       | 120(1)                                                                        |
| Space group                                                                   | <i>Pna</i> 2 <sub>1</sub>                                                    | <i>Pbca</i>                                                                   |
| No. of formula units per unit cell, <i>Z</i>                                  | 4                                                                            | 4                                                                             |
| No. of reflections measured                                                   | 6448                                                                         | 11756                                                                         |
| No. of independent reflections                                                | 2567                                                                         | 1742                                                                          |
| <i>R</i> <sub>int</sub>                                                       | 0.073                                                                        | 0.023                                                                         |
| Final <i>R</i> 1 values ( <i>I</i> > 2σ( <i>I</i> ))                          | 0.058                                                                        | 0.019                                                                         |
| Final <i>wR</i> ( <i>F</i> <sup>2</sup> ) values ( <i>I</i> > 2σ( <i>I</i> )) | 0.107                                                                        | 0.029                                                                         |
| CCDC                                                                          | 1060354                                                                      | 1060510                                                                       |

**Table S2**Selected bond lengths (Å) and bond angles (°) for complex **1**

---

| <i>Bond lengths</i> |           |
|---------------------|-----------|
| Pd1-N1              | 2.057(12) |
| Pd1-N2              | 2.059(14) |
| Pd1-O1              | 2.019(9)  |
| Pd1-O3              | 2.019(10) |
| <i>Bond angles</i>  |           |
| O1-Pd1-N1           | 85.3(5)   |
| O3-Pd1-N1           | 94.3(5)   |
| O3-Pd1-N2           | 85.0(5)   |
| O1-Pd1-N2           | 95.4(5)   |
| O1-Pd1-O3           | 179.4(5)  |
| N1-Pd1-N2           | 179.3(8)  |

---

**Table S3**Selected bond lengths (Å) and bond angles (°) for complex **2**

---

| <i>Bond lengths</i>                   |            | <b>2</b> |
|---------------------------------------|------------|----------|
| Pd1-N1                                | 2.0361(15) |          |
| Pd1-N1 <sup>i</sup>                   | 2.0361(15) |          |
| Pd1-Cl1                               | 2.3031(5)  |          |
| Pd1-Cl1 <sup>i</sup>                  | 2.3031(5)  |          |
| <i>Bond angles</i>                    |            |          |
| N1-Pd1-Cl1                            | 88.12(4)   |          |
| N1 <sup>i</sup> -Pd1-Cl1              | 91.88(4)   |          |
| N1-Pd1-Cl1 <sup>i</sup>               | 91.88(4)   |          |
| N1 <sup>i</sup> -Pd1-Cl1 <sup>i</sup> | 88.12(4)   |          |
| Cl1-Pd1-Cl1 <sup>i</sup>              | 180.0(5)   |          |
| N1-Pd1-N1 <sup>i</sup>                | 180.0(5)   |          |

---

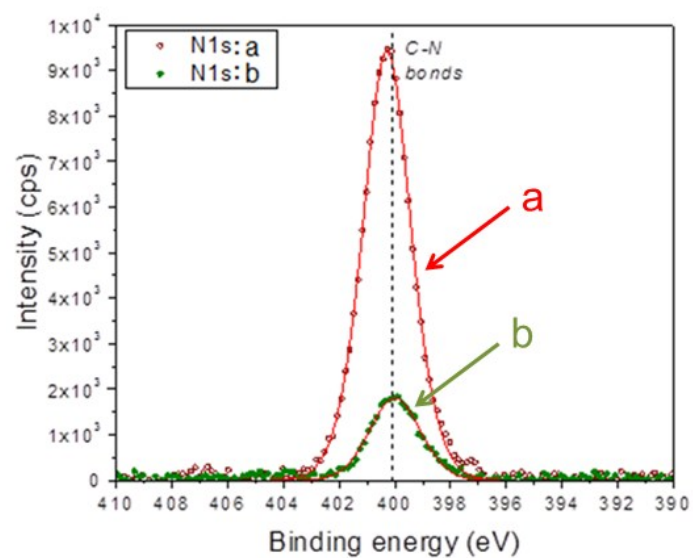

**Fig. S10** HR-XPS N1s spectra of (a) fresh CB[6]-Pd NPs (**3**) and (b) CB[6]-Pd NPs (**3**) after fifth runs.
